# Supplementary material for: Direct observations of blob deformation during a substorm
Source: Copernicus journal article supplement (doi:10.5194/angeo-33-525-2015), 2015-05-06
Supplement: Supplementary file 3 [file Figure 3.pdf › Figure 3.pdf]

Altitude [km]

(a)

Time: 1714-1715UT AE: 38.0nT F10.7: 138

(b)

Time: 1739-1740UT AE: 114.0nT F10.7: 138

(c)

Time: 1755-1756UT AE: 310.0nT F10.7: 138

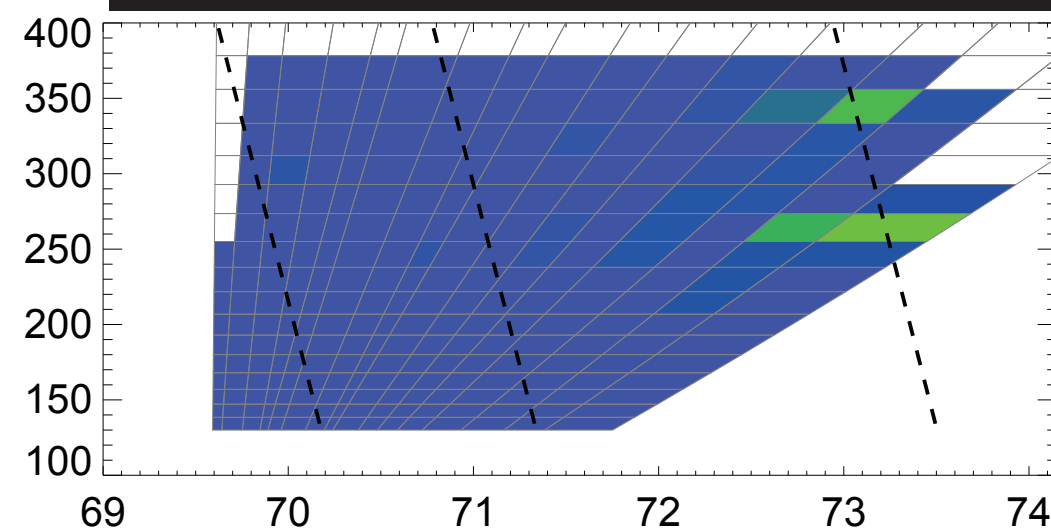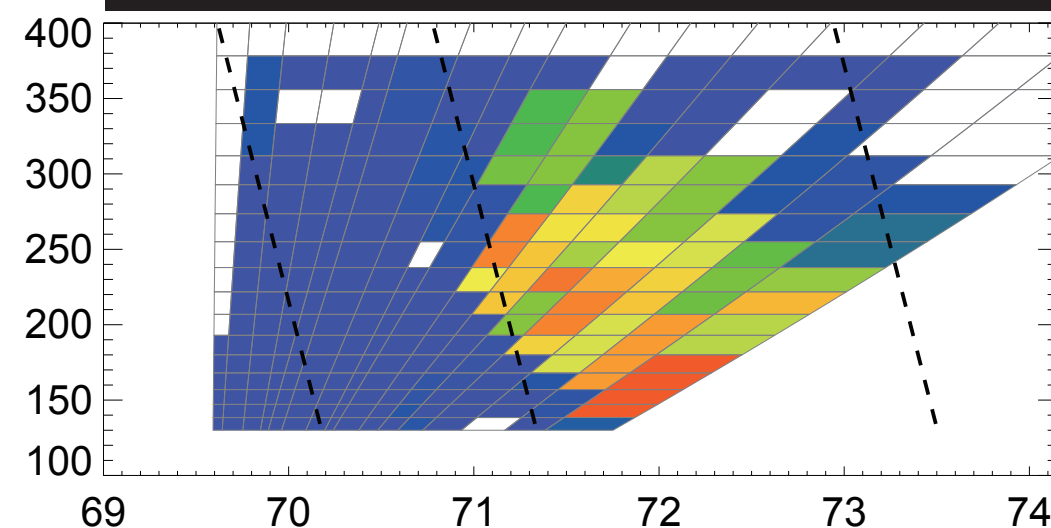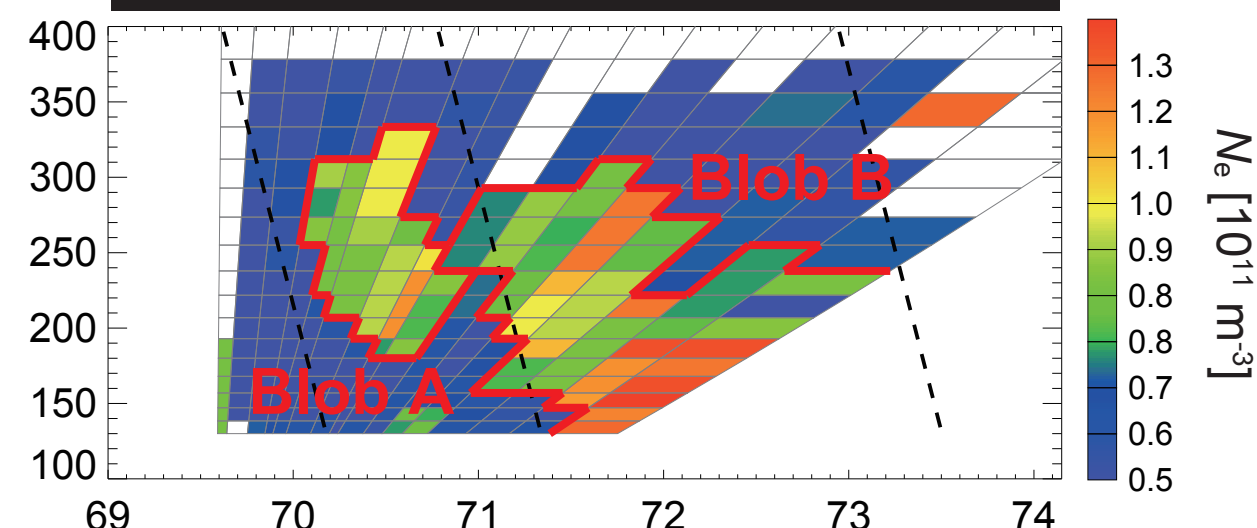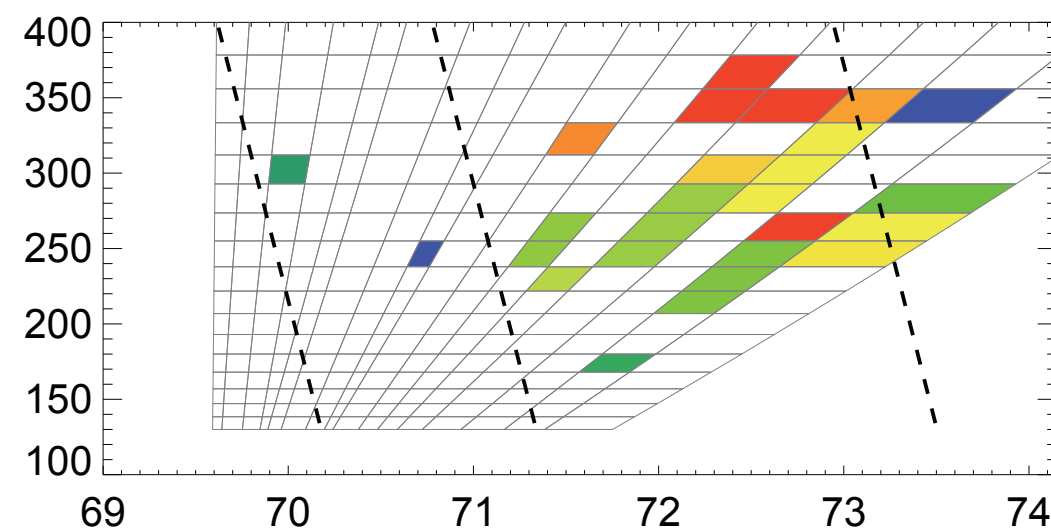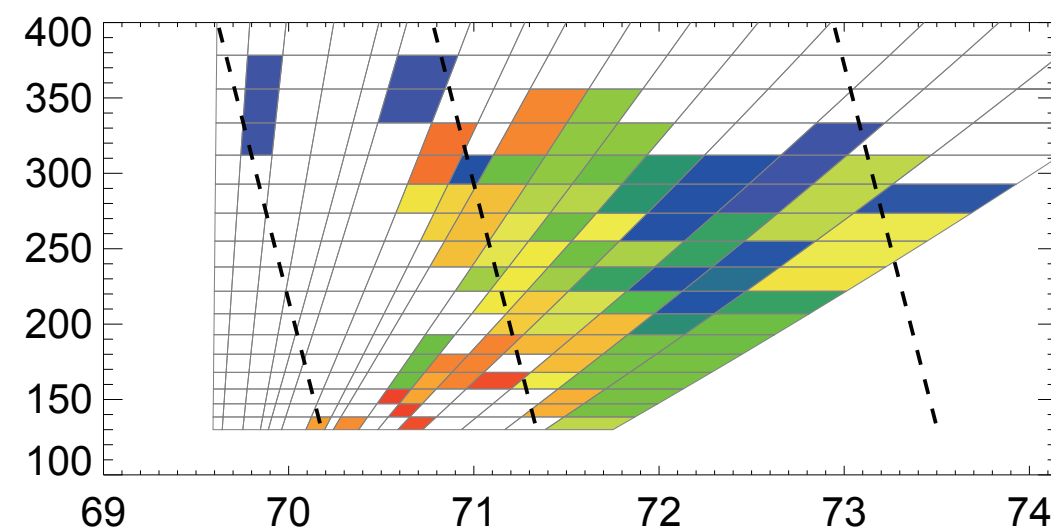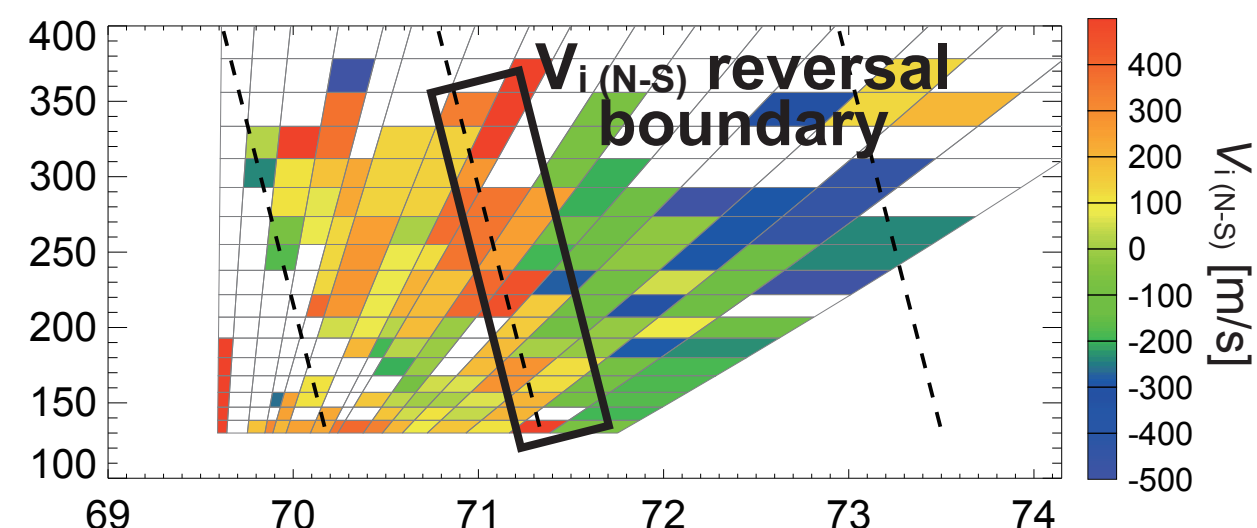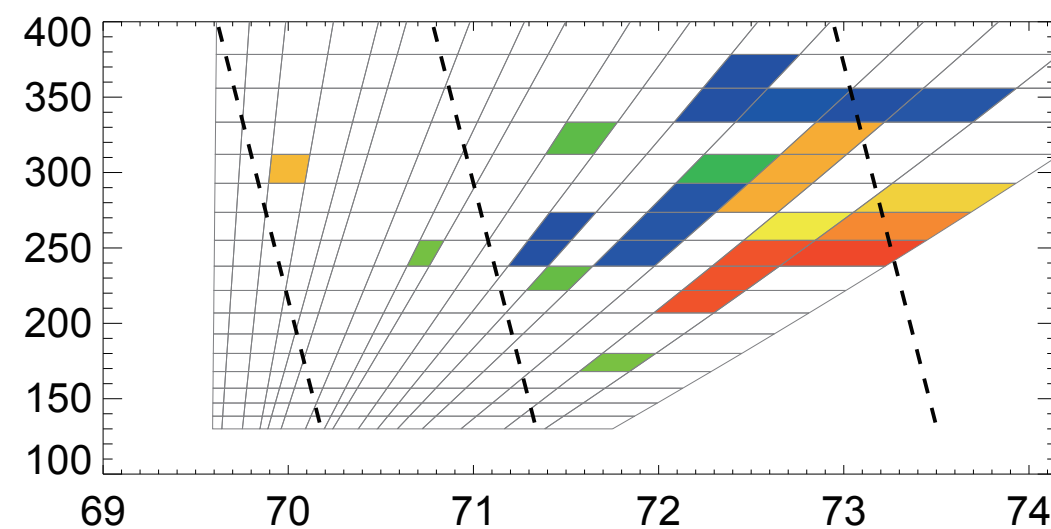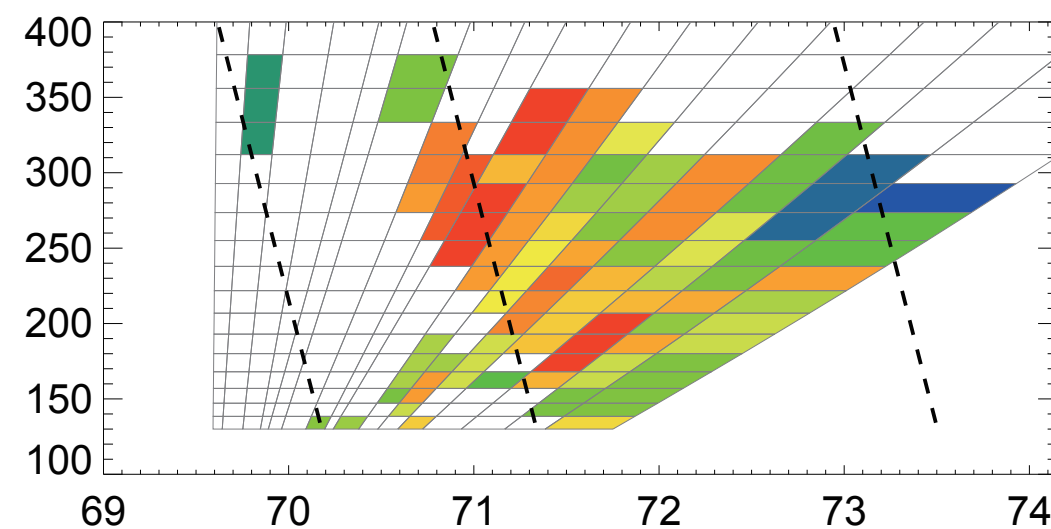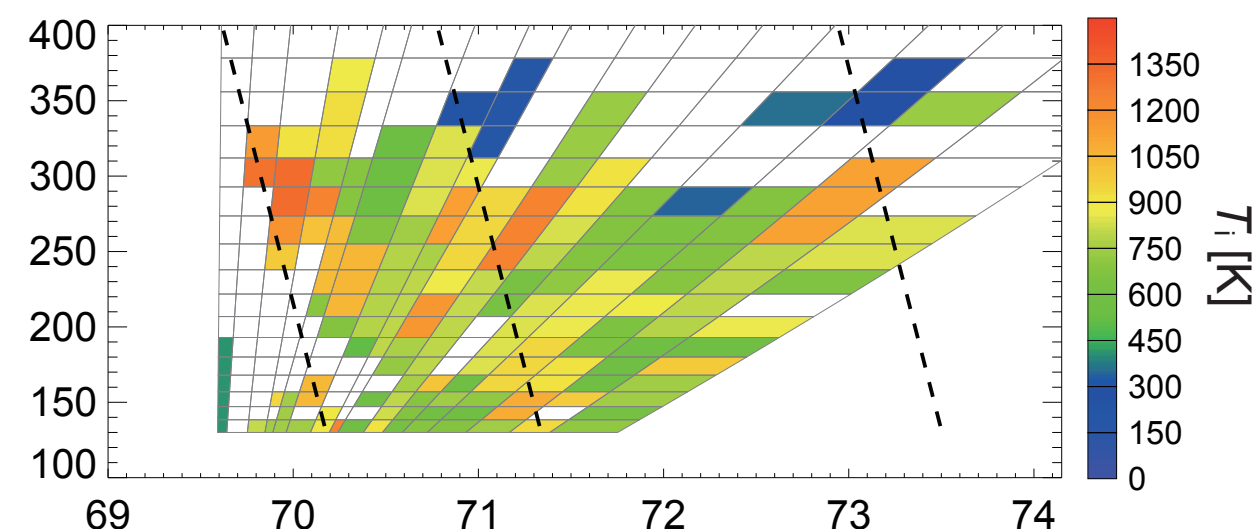

Geographic latitude [deg] with Geomagnetic latitude at an altitude of 210 km
