# Supplementary material for: Direct observations of blob deformation during a substorm
Source: Copernicus journal article supplement (doi:10.5194/angeo-33-525-2015), 2015-05-06
Supplement: Supplementary file 4 [file angeo-33-525-2015-supplement-cover-letter.pdf › angeo-33-525-2015-supplement-cover-letter.pdf]

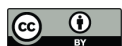

## *Supplement of*

# **Direct observations of blob deformation during a substorm**

**T. Ishida et al.**

*Correspondence to:* T. Ishida (ishida.tetsuro@nipr.ac.jp)

- [angeo-33-525-2015-supplement-cover-letter.pdf](#)
- [Figure 1.pdf](#)
- [Figure 2.pdf](#)
- [Figure 3.pdf](#)
- [movie.avi](#)
