# Supplementary figures and images for: Direct observations of blob deformation during a substorm
Source: Copernicus journal article supplement (doi:10.5194/angeo-33-525-2015), 2015-05-06

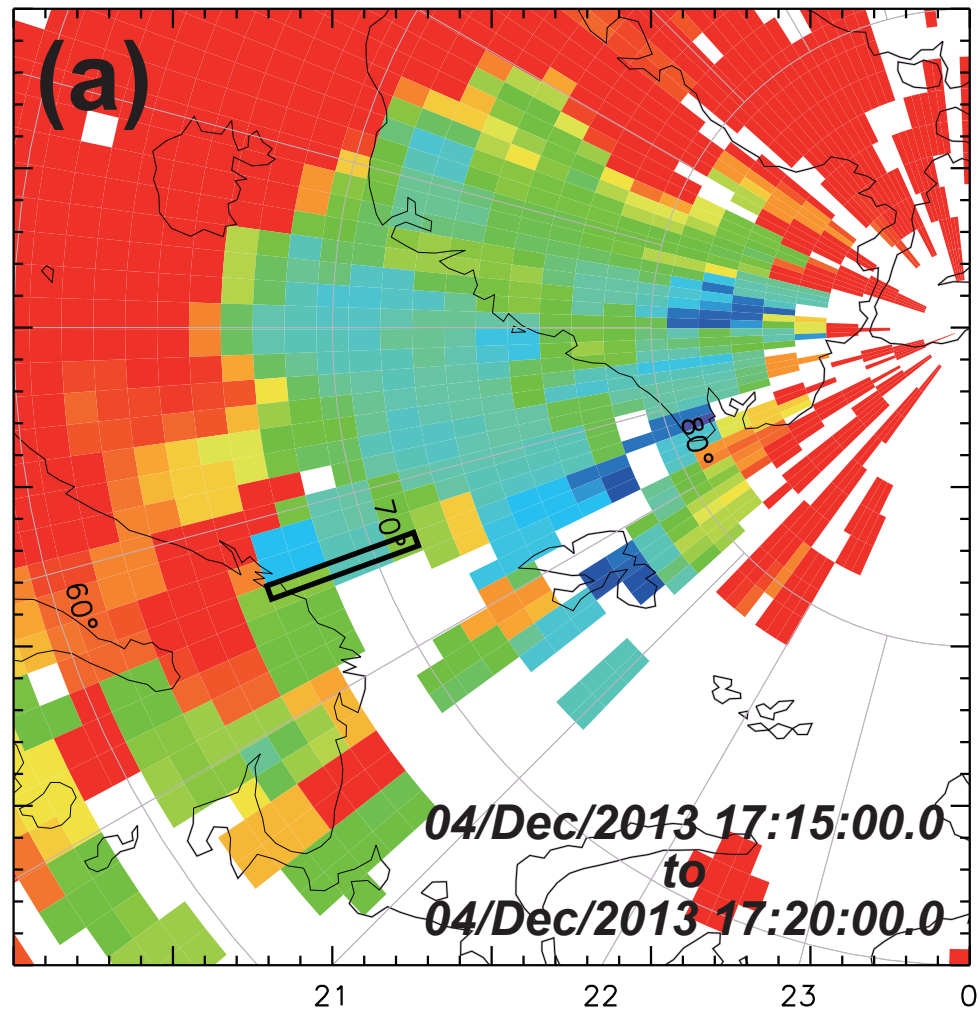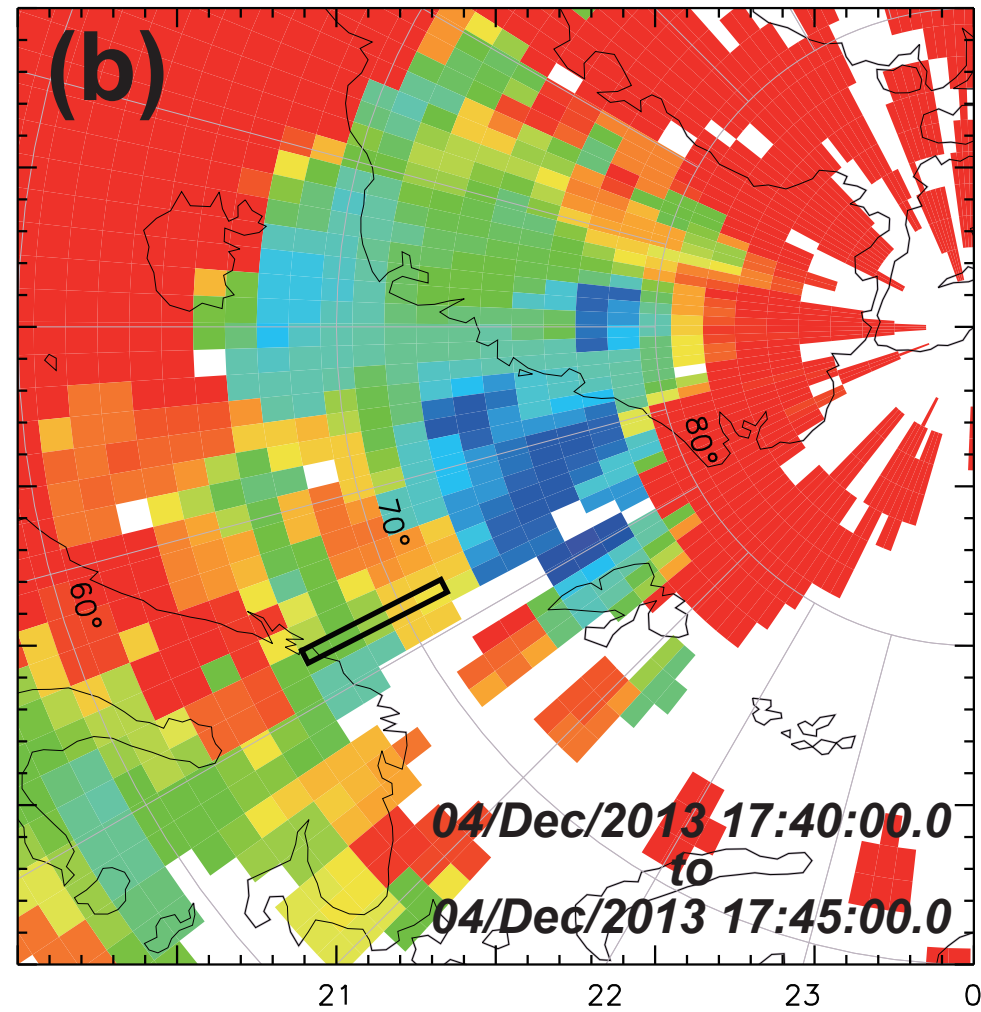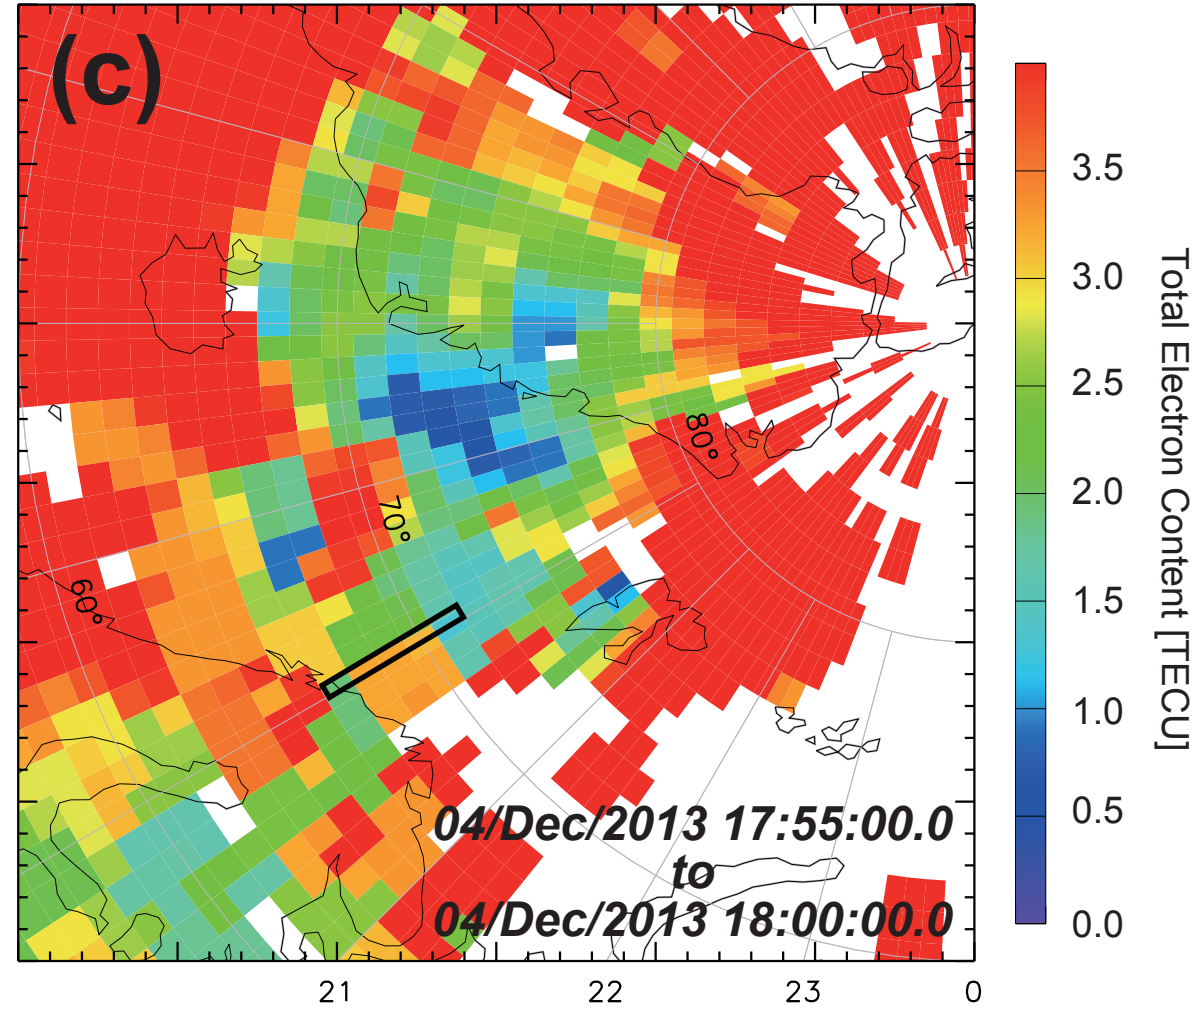

Supplement: Supplementary file 1 [file Figure 1.pdf › Figure 1.pdf]

(a) onset (b) (c)

Geomagnetic latitude [deg]

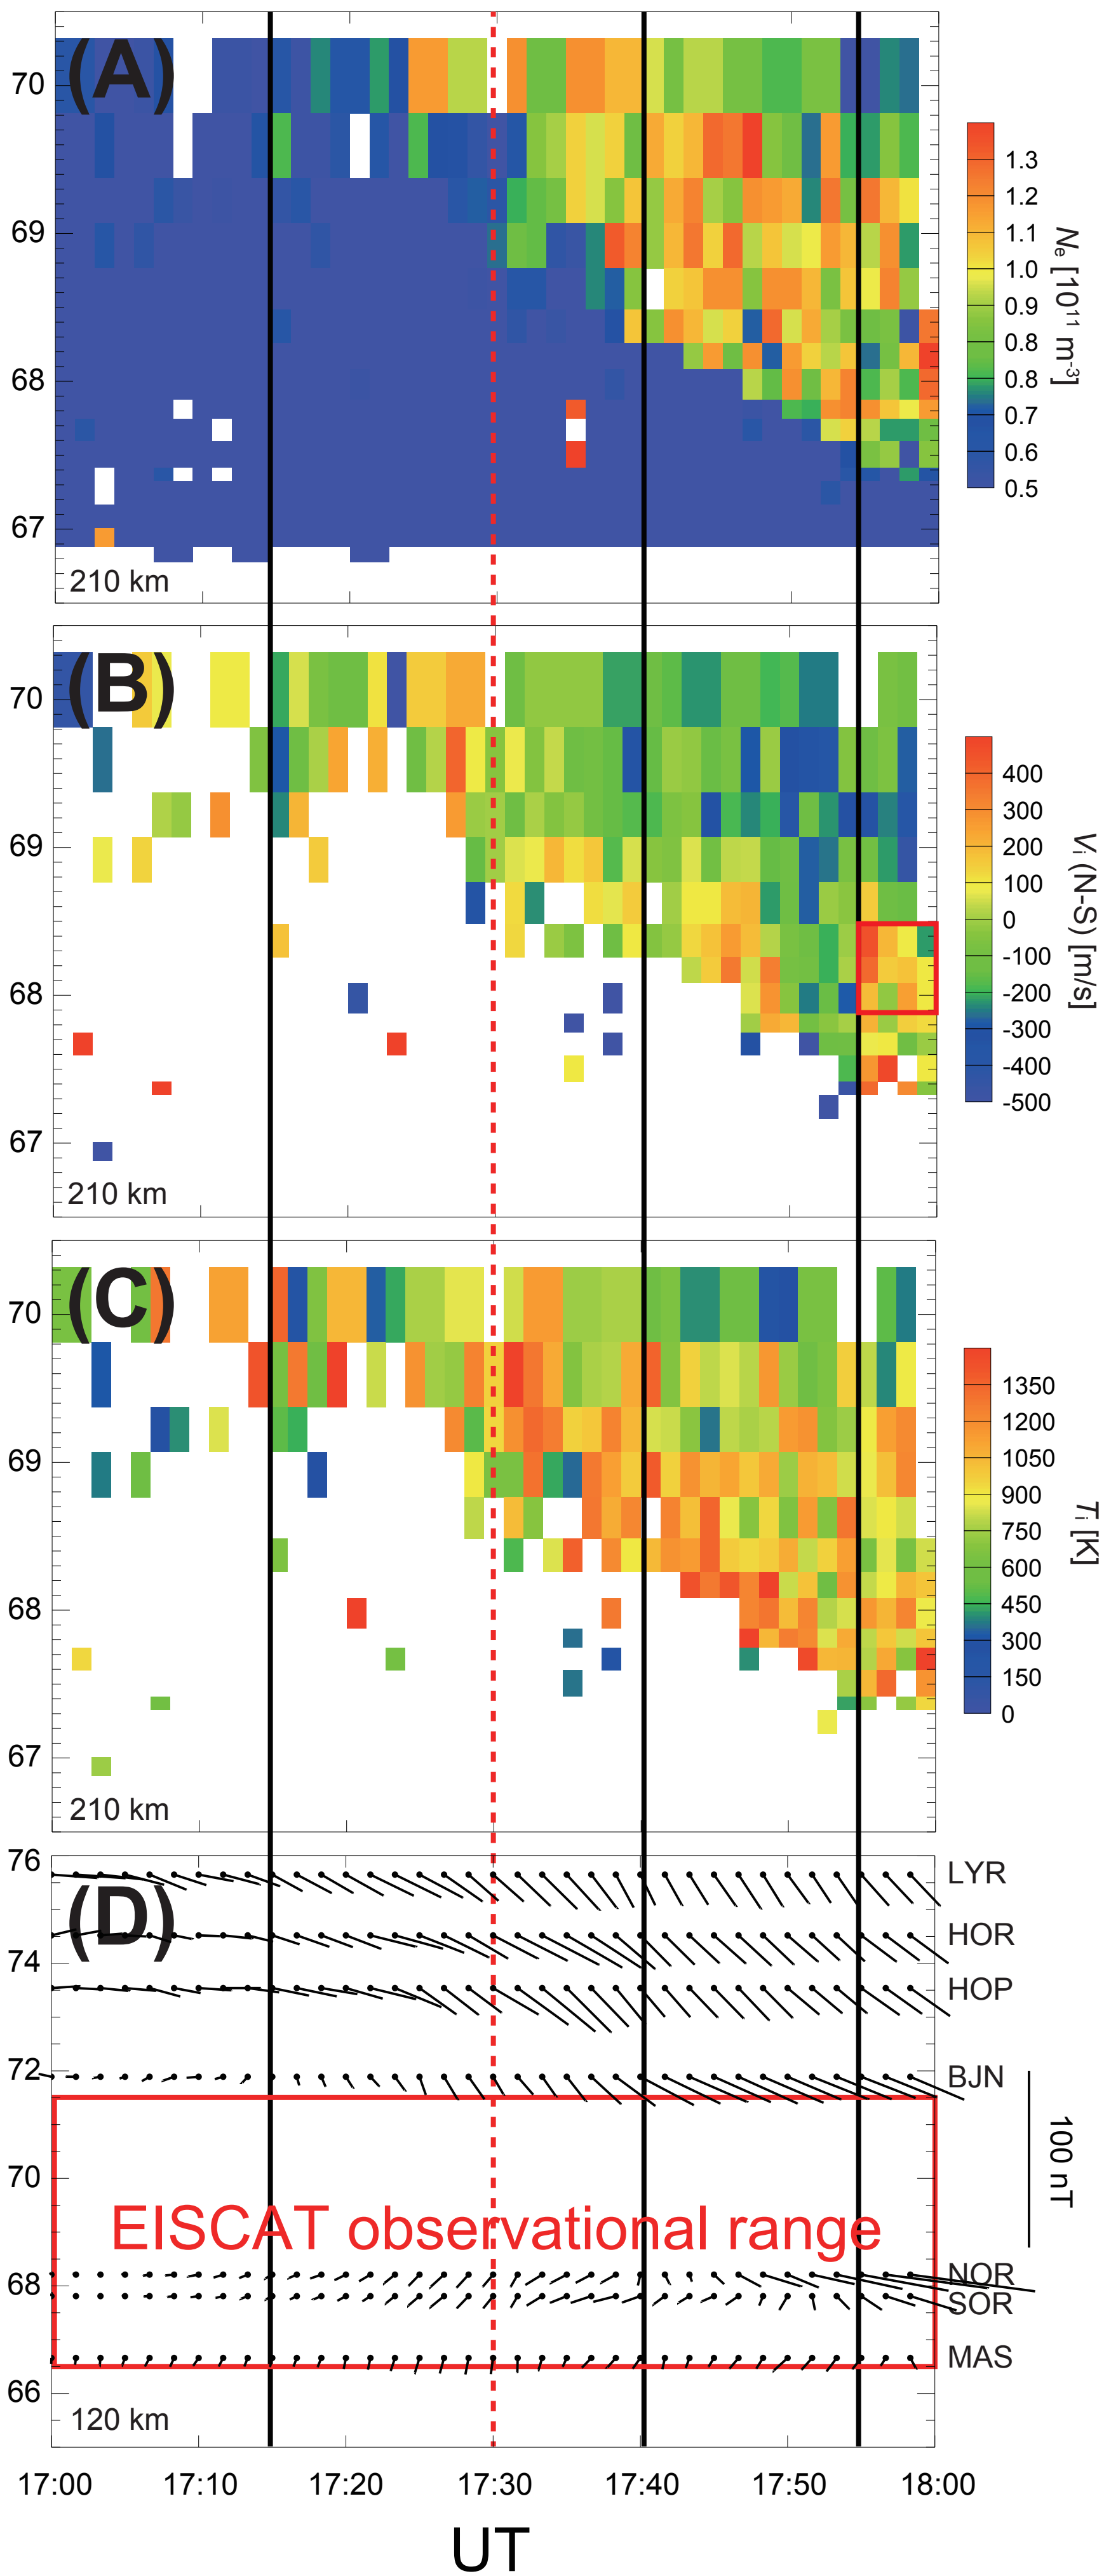

Supplement: Supplementary file 2 [file Figure 2.pdf › Figure 2.pdf]
